# Supplementary material for: A proton conductor showing an indication of single-ion magnet behavior based on a mononuclear Dy(iii) complex
Source: Royal Society of Chemistry journal article supplement (doi:10.1039/d0tc04423g), 2020-11-02
Supplement: d0tc04423g1.pdf [file d0tc04423g1.pdf]

## **A Proton Conductor Showing an Indication of Single-ion Magnet Based on a Mononuclear Dy(III) Complex**

Shui-Dong Zhu<sup>a</sup>, Lu Dong<sup>c</sup>, Jun-Jie Hu<sup>a</sup>, He-Rui Wen<sup>\*, a</sup>, Ying-Bing Lu<sup>c</sup>, Wei-Hua Deng<sup>b</sup>,  
Cai-Ming Liu<sup>\*, d</sup>, Shui-Jun Liu<sup>a</sup>, Gang Xu<sup>b</sup> and Zhi-Hua Fu<sup>\*, b</sup>

<sup>a</sup>*School of Chemistry and Chemical Engineering, Jiangxi University of Science and Technology, Ganzhou 341000, Jiangxi Province, P.R. China.*

<sup>b</sup>*State Key Laboratory of Structural Chemistry, Fujian Institute of Research on the Structure of Matter, Chinese Academy of Sciences, Fuzhou, Fujian 350002, P. R. China.*

<sup>c</sup>*Jiangxi Key Laboratory of Function of Materials Chemistry, College of Chemistry and Chemical Engineering, Gannan Normal University, Ganzhou, 341000, P. R. China.*

<sup>d</sup>*Beijing National Laboratory for Molecular Sciences, Center for Molecular Science, Key Laboratory of Organic Solids, Institute of Chemistry, Chinese Academy of Sciences, Beijing 100190, P. R. China.*

E-mail: wenherui63@163.com, zhihuafu@fjirsm.ac.cn, cmliu@iccas.ac.cn

## CONTENTS

**Table S1.** X-ray Diffraction Crystallographic Data for **1**.

**Table S2.** Selected Bond Lengths (Å) and Bond Angles (°) for **1**.

**Table S3.** Summary of SHAPE analysis for **1**.

**Table S4.** H-bonding length and angle table for **1**.

**Figure S1.** Sphenocorona coordination polyhedron around the Dy<sup>III</sup> ion in **1**.

**Figure S2.** 3-D supramolecular network of **1** formed by H-bond along the *c*-axis.

**Figure S3.** TGA plot of **1**.

**Figure S4.** PXRD patterns of simulated one, as-synthesized sample, the sample after proton conduction of **1**.

**Figure S5.** Nyquist plot for **1** at 25 °C under 100% RH.

**Figure S6.** Nyquist plot for **1** at 35 °C under 100% RH.

**Figure S7.** The photograph of crystals of complex **1** after exposed to 25-35 °C and 60-100% RH conditions during the whole proton conductivity measurements.

**Table S5.** Proton conductivity of **1** at 25 °C under variable relative humidity (RH).

**Table S6.** Comparison of the proton conductivity of **1** with that of imidazole/imidazole derivatives-based conducting materials.

**Figure S8.** AC susceptibility measurements at frequency with 977 Hz for **1** at  $H_{dc} = 0$  Oe,  $H_{ac} = 2.5$  Oe.

**Table S7.** Linear combination of two modified debye model fitting parameters from 2 to 7 K at  $H_{dc} = 2000$  Oe.

**Table S8.** The comparisons of the proton conductivity and the  $U_{eff}/k$  values of **1** with the previously reported proton-conductive nanomagnet.

**Figure S9.** IR spectra for **1**

**Table 1.** X-ray Diffraction Crystallographic Data for **1**.

| Complex <b>1</b>          |                                                                   |                                             |                |
|---------------------------|-------------------------------------------------------------------|---------------------------------------------|----------------|
| Formula                   | C <sub>12</sub> H <sub>16</sub> DyN <sub>11</sub> O <sub>11</sub> | $\rho$ (mm <sup>-1</sup> )                  | 3.747          |
| Fw                        | 652.86                                                            | F (000)                                     | 1276           |
| Temp (K)                  | 296(2)                                                            | Reflns collected                            | 12586          |
| Crystal system            | Monoclinic                                                        | Independent reflns                          | 1756           |
| Space group               | C2/c                                                              | $R_{int}$                                   | 0.0170         |
| $a$ , Å                   | 14.3641(2)                                                        | Theta range, $^{\circ}$                     | 2.01-25.00     |
| $b$ , Å                   | 15.5489(2)                                                        | Params/restraints/data                      | 1756 / 3 / 168 |
| $c$ , Å                   | 9.79550(10)                                                       | $R_1 [I > 2\sigma(I)]$                      | 0.0206         |
| $\beta$ , (deg)           | 111.0960(10)                                                      | $wR_2$ (all data)                           | 0.0498         |
| $V$ , Å <sup>3</sup>      | 2041.16(4)                                                        | GOF on $F^2$                                | 0.995          |
| $Z$                       | 4                                                                 | $\rho_{max}/\rho_{min}$ , e Å <sup>-3</sup> | 0.975/ -0.339  |
| $D_c$ , g/cm <sup>3</sup> | 2.124                                                             |                                             |                |

**Table S2.** Selected Bond Lengths (Å) and Bond Angles ( $^{\circ}$ ) for **1**

| Bond Lengths (Å)           |            | Bond Lengths (Å)           |           |
|----------------------------|------------|----------------------------|-----------|
| Dy(1)-O(1W)#1              | 2.392(3)   | Dy(1)-N(1)#1               | 2.558(3)  |
| Dy(1)-O(1W)                | 2.392(3)   | Dy(1)-N(3)#1               | 2.558(3)  |
| Dy(1)-O(1)#1               | 2.456(3)   | Dy(1)-N(3)                 | 2.557(3)  |
| Dy(1)-O(1)                 | 2.456(3)   | Dy(1)-O(2)#1               | 2.699(3)  |
| Dy(1)-N(1)                 | 2.558(3)   | Dy(1)-O(2)                 | 2.699(3)  |
| N(6)-O(5)                  | 1.230(5)   | C(5)-C(6)                  | 1.355(5)  |
| Bond Angles ( $^{\circ}$ ) |            | Bond Angles ( $^{\circ}$ ) |           |
| O(1W)#1-Dy(1)-O(1W)        | 146.52(13) | O(1W)#1-Dy(1)-O(1)#1       | 114.69(9) |
| O(1W)-Dy(1)-O(1)#1         | 76.12(9)   | O(1W)-Dy(1)-N(1)#1         | 137.78(9) |
| O(1W)#1-Dy(1)-N(3)#1       | 81.12(10)  | O(1)#1-Dy(1)-N(3)          | 139.98(9) |

Symmetry Codes for **1**, #1:-x, y, 0.5-z.

**Table S3.** Summary of SHAPE analysis for **1**.

| label      | shape                                  | symmetry         | Distortion( $\tau$ ) |
|------------|----------------------------------------|------------------|----------------------|
| DP-10      | Decagon                                | D <sub>10h</sub> | 29.422               |
| EPY-10     | Enneagonal pyramid                     | C <sub>9v</sub>  | 20.278               |
| OBPY-10    | Octagonal bipyramid                    | D <sub>8h</sub>  | 22.029               |
| PPR-10     | Pentagonal prism                       | D <sub>5h</sub>  | 15.868               |
| PAPR-10    | Pentagonal antiprism                   | D <sub>5d</sub>  | 16.180               |
| JBCCU-10   | Bicapped cube J15                      | D <sub>4h</sub>  | 10.206               |
| JBCSAPR-10 | Bicapped square antiprism J17          | D <sub>4d</sub>  | 7.351                |
| JMBIC-10   | Metabidiminshed icosahedron J62        | C <sub>2v</sub>  | 11.827               |
| JATDI-10   | Augmented tridiminshed icosahedron J64 | C <sub>3v</sub>  | 17.005               |
| JSPC-10    | Sphenocorona J87                       | C <sub>2v</sub>  | 4.359                |
| SDD-10     | Staggered Dodecahedron (2:6:2)         | D <sub>2</sub>   | 7.726                |
| TD-10      | Tetradecahedron (2:6:2)                | C <sub>2v</sub>  | 7.919                |
| HD-10      | Hexadecahedron (2:6:2) or (1:4:4:1)    | D <sub>4h</sub>  | 13.262               |

**Table S4.** H-bonding length and angle table for **1**.

| D-H...A        | d(H...A)(Å) | d(D...A)(Å) | <DHA(Å) |
|----------------|-------------|-------------|---------|
| O1W-H1WA ...O4 | 1.93(2)     | 2.727(4)    | 160(3)  |
| O1W-H1WA...O5  | 2.557(18)   | 3.276(3)    | 145(3)  |
| N2-H2...O4     | 2.36        | 3.136(4)    | 150     |
| N2-H2...O4     | 2.50        | 3.219(4)    | 142     |
| O1W-H1WB...O2  | 2.10(2)     | 2.889(4)    | 157(3)  |
| N4-H4...O5     | 2.07        | 2.880(4)    | 156     |
| O1W-H1WB...O2  | 2.39(2)     | 2.776(9)    | 108     |

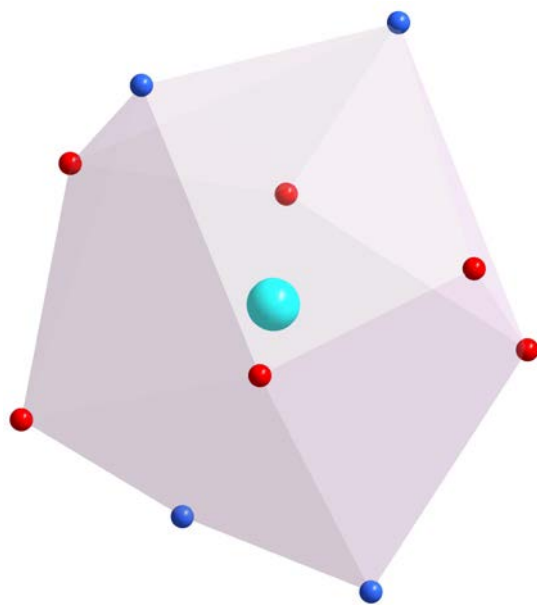

**Figure S1.** Sphenocorona coordination polyhedron around the Dy<sup>III</sup> ion in **1**.

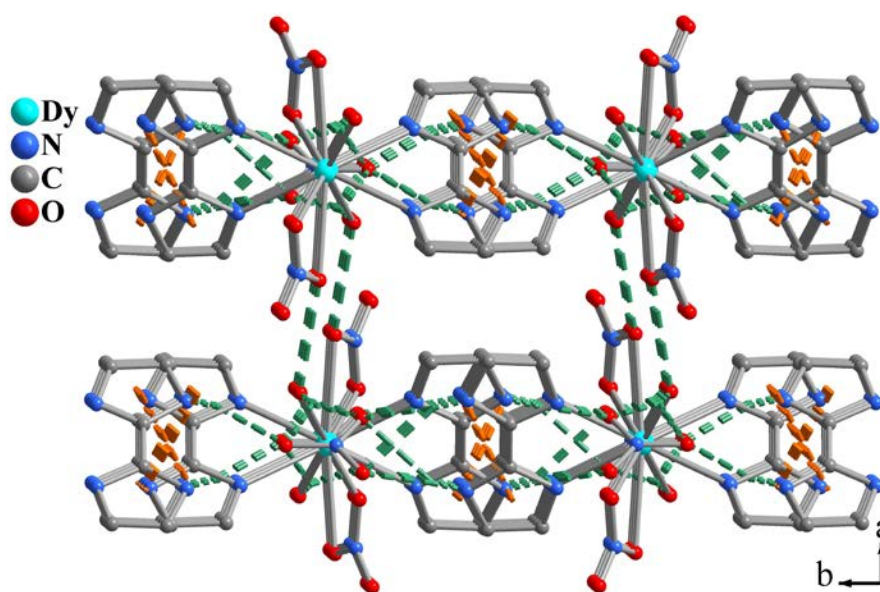

**Figure S2.** 3-D supramolecular network of **1** formed by H-bond along the *c*-axis (green dashed lines).

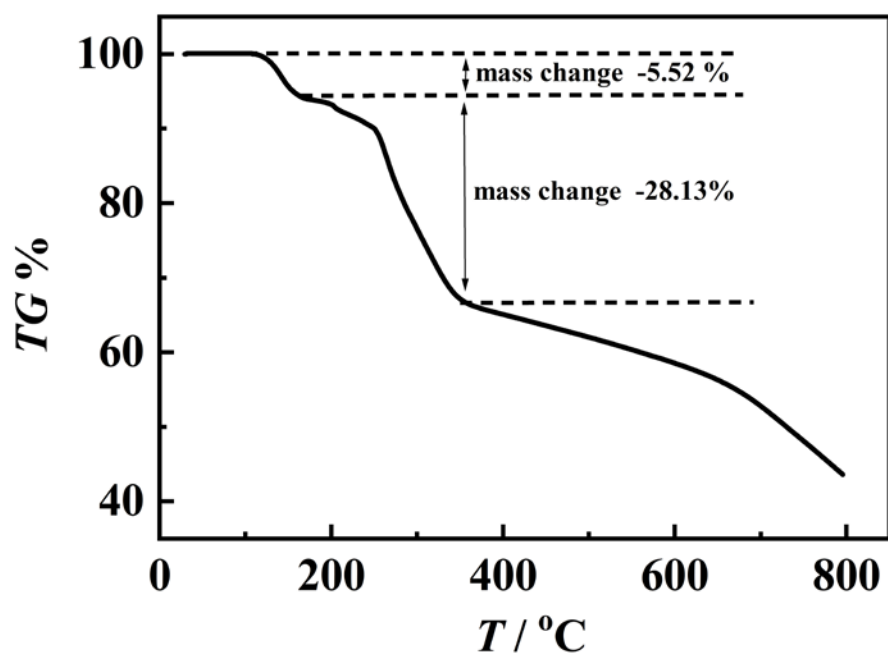

Figure S3. TGA plot of 1.

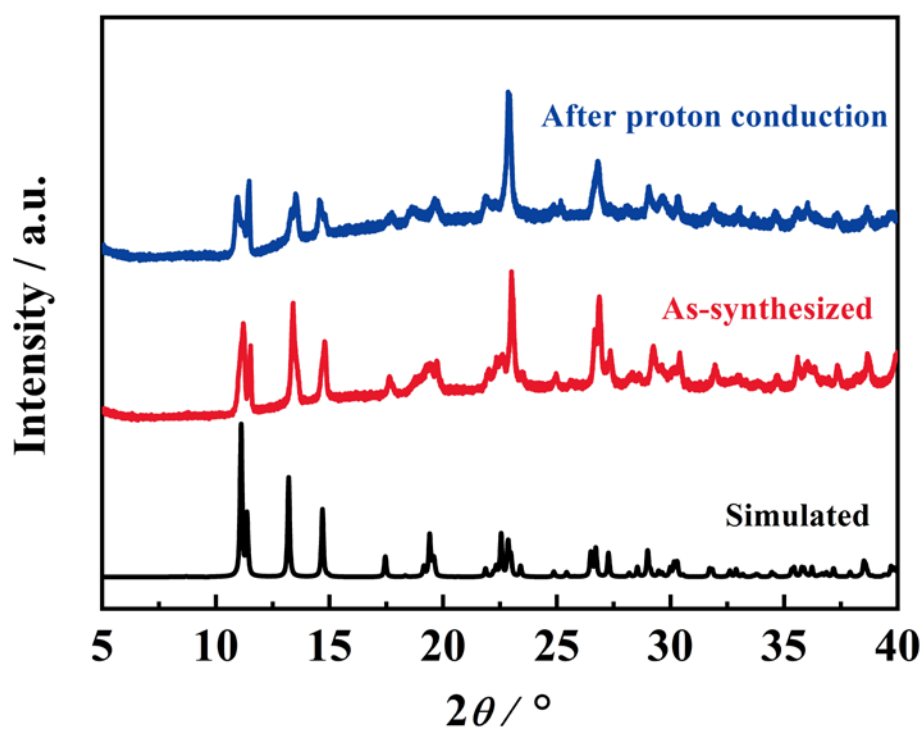

Figure S4. Powder X-ray diffraction patterns of simulated one, as-synthesized sample, the sample after proton conduction of 1.

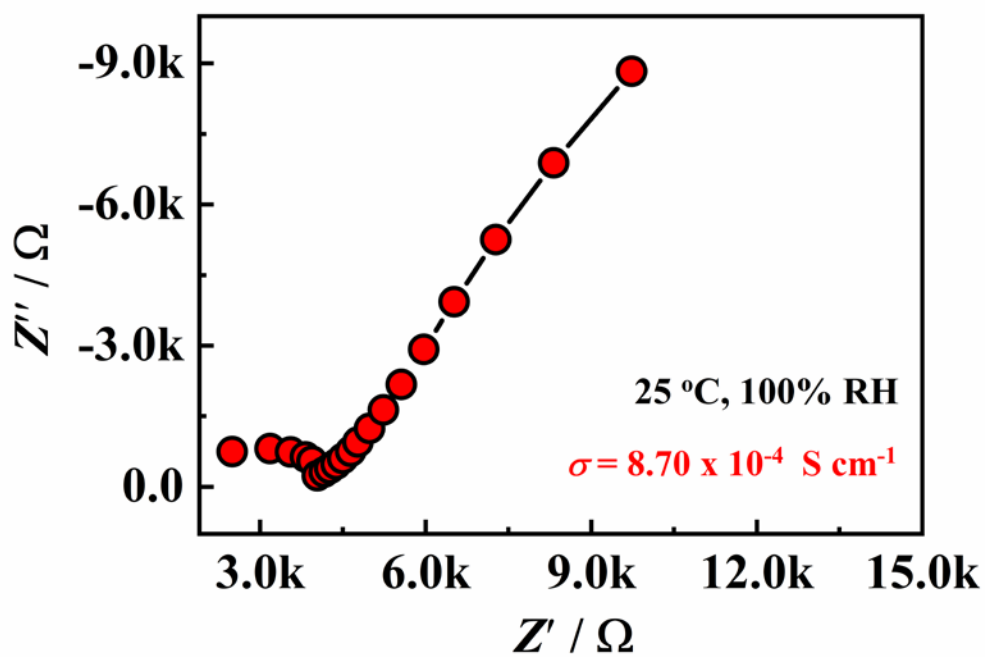

Figure S5. Nyquist plot for **1** at 25 °C under 100% RH.

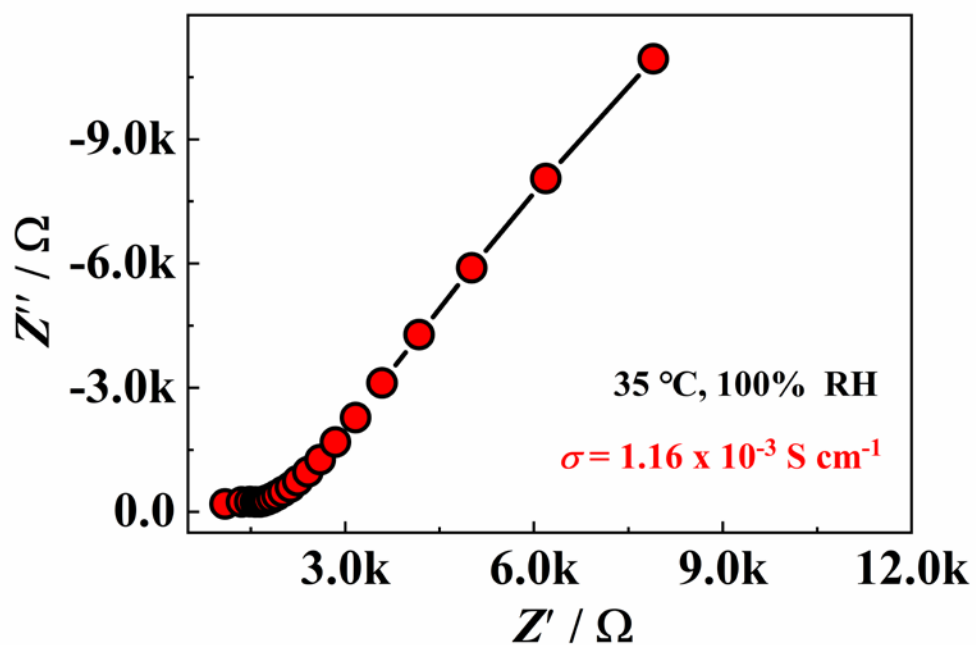

Figure S6. Nyquist plot for **1** at 35 °C under 100% RH.

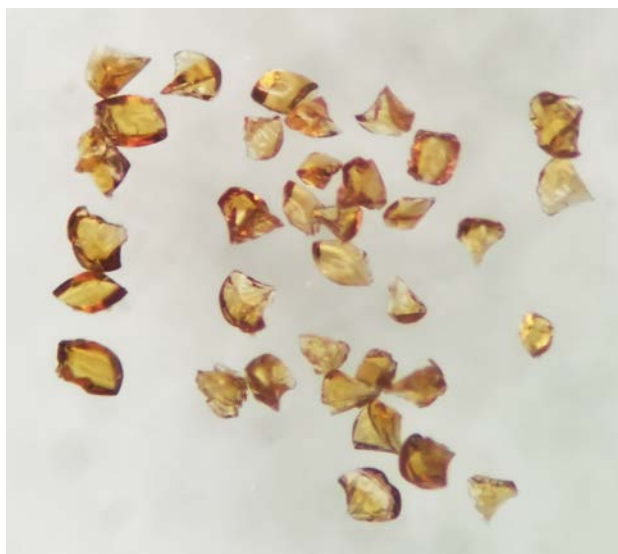

**Figure S7.** The photograph of crystals of complex **1** after exposed to 25-35 °C and 60-100% RH conditions during the whole proton conductivity measurements.

**Table S5.** Proton conductivity of **1** at 25 °C under variable relative humidity (RH).

| RH / % | $\sigma$ / S cm <sup>-1</sup> |
|--------|-------------------------------|
| 20     | $5.12 \times 10^{-10}$        |
| 30     | $2.47 \times 10^{-9}$         |
| 40     | $2.49 \times 10^{-8}$         |
| 50     | $1.23 \times 10^{-7}$         |
| 60     | $1.16 \times 10^{-6}$         |
| 70     | $5.73 \times 10^{-6}$         |
| 80     | $4.36 \times 10^{-5}$         |
| 90     | $2.80 \times 10^{-4}$         |
| 100    | $8.70 \times 10^{-4}$         |

**Table S6.** Comparison of the proton conductivity of **1** with that of imidazole/imidazole derivatives-based conducting materials by using compacted pellets at relatively low temperature.  $\sigma$  represents proton conductivity and RH stands for relative humidity.

| Compounds | Conductivity (S cm <sup>-1</sup> ) | Conditions (°C, RH) | References |
|-----------|------------------------------------|---------------------|------------|
|           |                                    |                     |            |



|   |                                                                                                                                                                                                                                                                                                                                                                                                |                                                                         |                                        |                                                                 |
|---|------------------------------------------------------------------------------------------------------------------------------------------------------------------------------------------------------------------------------------------------------------------------------------------------------------------------------------------------------------------------------------------------|-------------------------------------------------------------------------|----------------------------------------|-----------------------------------------------------------------|
| 1 | [Dy(H <sub>2</sub> bim) <sub>2</sub> (NO <sub>3</sub> ) <sub>2</sub> (H <sub>2</sub> O) <sub>2</sub> ]·(NO <sub>3</sub> )                                                                                                                                                                                                                                                                      | 8.70×10 <sup>-4</sup><br>1.16×10 <sup>-3</sup>                          | 25°C, 100%<br>35°C, 100%               | <b>This work</b>                                                |
| 2 | [Cr <sub>4</sub> In <sub>4</sub> (Himdc) <sub>12</sub> ]·H <sub>2</sub> O<br>[Cr <sub>7.28</sub> In <sub>0.72</sub> (Himdc) <sub>12</sub> ]·H <sub>2</sub> O<br>(L= 4,5-imidazole-dicarboxylate)                                                                                                                                                                                               | 2.3×10 <sup>-3</sup><br>2.1×10 <sup>-3</sup>                            | 22.5 °C, 98%<br>22.5 °C, 98%           | <i>Angew. Chem. Int. Edit.</i> , <b>2015</b> , 54, 7886–7890    |
| 3 | {Na[Cd(MIDC)]} <sub>n</sub> (H <sub>3</sub> MIDC=2-methyl-1H-imidazole-4,5-dicarboxylic acid)                                                                                                                                                                                                                                                                                                  | 1.04×10 <sup>-3</sup>                                                   | 100°C, 98%                             | <i>ACS Appl. Mater. Interfaces.</i> <b>2019</b> , 11, 1713–1722 |
| 4 | {[Co <sub>3</sub> (p-CPhHIDC) <sub>2</sub> (4,4'-bipy)(H <sub>2</sub> O) <sub>2</sub> H <sub>2</sub> O]} <sub>n</sub><br>{[Co <sub>3</sub> (p-CPhHIDC) <sub>2</sub> (bpe)(H <sub>2</sub> O) <sub>3</sub> H <sub>2</sub> O]} <sub>n</sub><br>(p-CPhH <sub>4</sub> IDC=2-(4-carboxylphenyl)-1H-imidazole-4,5-dicarboxylic acid; 4,4'-bipy=4,4'-bipyridine, bpe=trans-1,2-bis(4-pyridyl)ethylene) | 1.04×10 <sup>-3</sup><br>7.02×10 <sup>-4</sup>                          | 100°C, 98%<br>100°C, 98%               | <i>Chem. Eur. J.</i> , <b>2019</b> , 25, 14108–14116            |
| 5 | [M <sub>2</sub> (o-CPhH <sub>2</sub> IDC) <sub>2</sub> (H <sub>2</sub> O) <sub>6</sub> ].4H <sub>2</sub> O<br>(M = Co (1) and Zn (2))<br>(o-CPhH <sub>4</sub> IDC = 2-(2-carboxylphenyl)-1H-imidazole-4,5-dicarboxylic acid) and<br>[Mn(o-CPhH <sub>2</sub> IDC)(2,2'-bipy)(H <sub>2</sub> O) <sub>2</sub> ] (2,2'-bipy = 2,2'-bipyridine)                                                     | 1.78×10 <sup>-4</sup><br>1.68×10 <sup>-4</sup><br>5.4×10 <sup>-5</sup>  | 100°C, 98%<br>100°C, 98%<br>100°C, 98% | <i>Appl. Supf. Sci.</i> , <b>2020</b> , 504, 144484             |
| 6 | [M(FPhH <sub>2</sub> IDC) <sub>2</sub> (H <sub>2</sub> O) <sub>2</sub> ].4H <sub>2</sub> O (M = Cd (1); Co (2))<br>Ni(FPhH <sub>2</sub> IDC) <sub>2</sub> (2,2'-bipy)·H <sub>2</sub> O<br>(FPhH <sub>3</sub> IDC = 2-(fluoro)phenyl-4,5-imidazole dicarboxylic acid, 2,2'-bipy = 2,2'-bipyridine)                                                                                              | 2.77×10 <sup>-4</sup><br>3.42×10 <sup>-5</sup><br>4.61×10 <sup>-5</sup> | 100°C, 98%<br>100°C, 98%<br>100°C, 98% | <i>J. Solid State Chem.</i> , <b>2019</b> , 282, 121129         |
| 7 | M(m <sub>3</sub> -HPhIDC)(m-C <sub>2</sub> O <sub>4</sub> ) <sub>0.5</sub> (H <sub>2</sub> O)·2 H <sub>2</sub> O (M = Tb; Eu)<br>(H <sub>3</sub> PhIDC=2-phenyl-1H-imidazole-4,5-dicarboxylic acid)                                                                                                                                                                                            | 8.95×10 <sup>-4</sup><br>4.63×10 <sup>-4</sup>                          | 100°C, 98%<br>100°C, 98%               | <i>Chem. Asian. J.</i> , <b>2019</b> , 15, 182-190              |
| 8 | {[Cd(p-TIPhH <sub>2</sub> IDC) <sub>2</sub> ]·H <sub>2</sub> O} <sub>n</sub><br>[p-TIPhH <sub>3</sub> IDC = 2-p-(1H-1,2,4-triazoly)phenyl-1H-4,5-imidazoledicarboxylic acid]<br>[Sr(DMPH <sub>2</sub> IDC) <sub>2</sub> ](n)<br>[DMPH <sub>3</sub> IDC = 2-(3,4-dimethylphenyl)-1H-imidazole-4,5-dicarboxylic acid]                                                                            | 1.24×10 <sup>-4</sup><br>9.2×10 <sup>-4</sup>                           | 100°C, 98%                             | <i>Inorg. Chem.</i> , <b>2019</b> , 58, 5173–5182               |
| 9 | {[Mn(o-CPhH <sub>2</sub> IDC)(4,4'-bipy)(0.5)(H <sub>2</sub> O) <sub>2</sub> ]·3H <sub>2</sub> O}(n) (1)                                                                                                                                                                                                                                                                                       | 5.74×10 <sup>-5</sup><br>5.00×10 <sup>-5</sup>                          | 100°C, 98%<br>100°C, 98%               | <i>New J. Chem.</i> , <b>2019</b> , 43,                         |

|    |                                                                                                                                                                                                                                                                                                                                                                                                    |                                                                      |                                     |                                                         |
|----|----------------------------------------------------------------------------------------------------------------------------------------------------------------------------------------------------------------------------------------------------------------------------------------------------------------------------------------------------------------------------------------------------|----------------------------------------------------------------------|-------------------------------------|---------------------------------------------------------|
|    | {[Zn <sub>5</sub> ( <i>o</i> -CPhH <sub>2</sub> IDC) <sub>2</sub> ( <i>o</i> -CPhHIDC) <sub>2</sub> (2,2-bipy) <sub>5</sub> ]·5H <sub>2</sub> O} <sub>n</sub> (2)<br>( <i>o</i> -CPhH <sub>4</sub> IDC = 2-phenyl(2-carboxyl)-1-H-imidazole-4,5-dicarboxylic acid; 4,4-bipy = 4,4-bipyridine, 2,2-bipy = 2,2-bipyridine)                                                                           |                                                                      |                                     | 4859-4866                                               |
| 10 | [Cd(HDMPhIDC)(H <sub>2</sub> O)] <sub>n</sub><br>(H <sub>3</sub> DMPHIDC=2-phenyl(3,4-dimethyl)-1-H-imidazole-4,5-dicarboxylic acid)                                                                                                                                                                                                                                                               | 1.30×10 <sup>-4</sup>                                                | 100°C, 98%                          | <i>New J. Chem.</i> , <b>2019</b> , 42, 20197–20204     |
| 11 | {[CoL <sub>2</sub> (H <sub>2</sub> O)(2)](ClO <sub>4</sub> ) <sub>2</sub> ·3DMA·0.4H <sub>2</sub> O} <sub>n</sub><br>(L=bis(4-imidazol-1-ylphenyl)diazene)                                                                                                                                                                                                                                         | 3.96×10 <sup>-4</sup>                                                | 80°C, 95%                           | <i>Cryst. Growth Des.</i> , <b>2018</b> , 18, 6211–6220 |
| 12 | [Ni(Imdz) <sub>6</sub> ] <sub>0.5</sub> (1,5-NDS) <sub>0.5</sub> ·H <sub>2</sub> O<br>[Ni(Imdz) <sub>6</sub> ] <sub>0.5</sub> (2,6-NDS) <sub>0.5</sub><br>[Ni(Imdz) <sub>6</sub> ] <sub>0.5</sub> (4,4'-BPDC) <sub>0.5</sub> ·H <sub>2</sub> O<br>(Imdz = imidazole, 1,5-NDS = 1,5-naphthalenedisulfonic acid, 2,6-NDS = 2,6-naphthalene disulfonate, 4,4'-BPDC = 4,4'-biphenyl dicarboxylic acid) | 7.5×10 <sup>-4</sup><br>3.5×10 <sup>-4</sup><br>9.7×10 <sup>-4</sup> | 80°C, 98%<br>80°C, 98%<br>80°C, 98% | <i>Chem. Eur. J.</i> , <b>2019</b> , 25, 1691–1695      |
| 13 | {[Sr( <i>o</i> -CPhH <sub>2</sub> IDC)(H <sub>2</sub> O) <sub>2</sub> ]·2H <sub>2</sub> O} <sub>n</sub>                                                                                                                                                                                                                                                                                            | 6.08×10 <sup>-5</sup>                                                | 100°C, 98%                          | <i>Polyhedron.</i> , <b>2019</b> , 169, 1–7             |
| 14 | [Cu <sub>4</sub> (HDMPhIDC) <sub>4</sub> (H <sub>2</sub> O) <sub>4</sub> ] <sub>n</sub><br>(H <sub>3</sub> DMPHIDC=2-(3,4-dimethyl)phenyl-4,5-imidazole dicarboxylic acid)                                                                                                                                                                                                                         | 2.58×10 <sup>-5</sup>                                                | 100°C, 98%                          | <i>Polyhedron.</i> , <b>2019</b> , 158, 377–385         |
| 15 | [Sr(H <sub>2</sub> PhIDC) <sub>2</sub> (H <sub>2</sub> O) <sub>4</sub> ]·2H <sub>2</sub> O<br>(H <sub>3</sub> PhIDC = 2-phenyl-4,5-imidazole dicarboxylic acid)                                                                                                                                                                                                                                    | 1.91×10 <sup>-6</sup>                                                | 90°C, 98%                           | <i>J. Alloys Compd.</i> , <b>2018</b> , 750, 895–901    |
| 16 | [Zn(2-MeBIM) <sub>2</sub> (OAc) <sub>2</sub> ]·3H <sub>2</sub> O<br>[Zn(2-MeBIM)(Pht)(H <sub>2</sub> O)]·2H <sub>2</sub> O<br>(2-MeBIM = 2-methyl benzimidazole, OAc = acetate anion and Pht = dianion of phthalate)                                                                                                                                                                               | 4.5×10 <sup>-6</sup><br>1.0×10 <sup>-5</sup>                         | 25°C, 100%<br>25°C, 100%            | <i>Inorg. Chim. Acta.</i> , <b>2015</b> , 437, 167–176  |
| 17 | [Sr(H <sub>2</sub> PhIDC) <sub>2</sub> (H <sub>2</sub> O) <sub>4</sub> ]·2H <sub>2</sub> O<br>(H <sub>3</sub> PhIDC = 2-phenyl-4,5-imidazole dicarboxylic acid)                                                                                                                                                                                                                                    | 1.91×10 <sup>-6</sup>                                                | 90°C, 98%                           | <i>J. Alloys Compd.</i> , <b>2018</b> , 750, 895–901    |
| 18 | Zn <sub>3</sub> (IBT) <sub>2</sub> (H <sub>2</sub> O) <sub>2</sub><br>(IBT = 4,5-bis(tetrazol-5-yl)imidazole)                                                                                                                                                                                                                                                                                      | 1.98×10 <sup>-5</sup>                                                | 30°C, 97%                           | <i>CrystEenComm.</i> , <b>2018</b> , 20, 3158–3161      |
| 19 | {[Mn( <i>o</i> -CPhH <sub>2</sub> IDC)(4,4-bipy) <sub>0.5</sub> (H <sub>2</sub> O) <sub>2</sub> ]·3H <sub>2</sub> O} <sub>n</sub><br>{[Zn <sub>5</sub> ( <i>o</i> -CPhH <sub>2</sub> IDC) <sub>2</sub> ( <i>o</i> -CPhHIDC) <sub>2</sub> (2,2-bipy) <sub>5</sub> ]·5H <sub>2</sub> O} <sub>n</sub><br>( <i>o</i> -CPhH <sub>4</sub> IDC = 2-phenyl                                                 | 5.74×10 <sup>-5</sup><br>5.00×10 <sup>-5</sup>                       | 100°C, 98%<br>100°C, 98%            | <i>New J. Chem.</i> , <b>2019</b> , 43, 4859–4866       |

|  |                                                                                                                  |  |  |  |
|--|------------------------------------------------------------------------------------------------------------------|--|--|--|
|  | (2-carboxyl)-1- <i>H</i> -imidazole-4,5-dicarboxylic acid, 4,4-bipy = 4,4-bipyridine, 2,2-bipy = 2,2-bipyridine) |  |  |  |
|--|------------------------------------------------------------------------------------------------------------------|--|--|--|

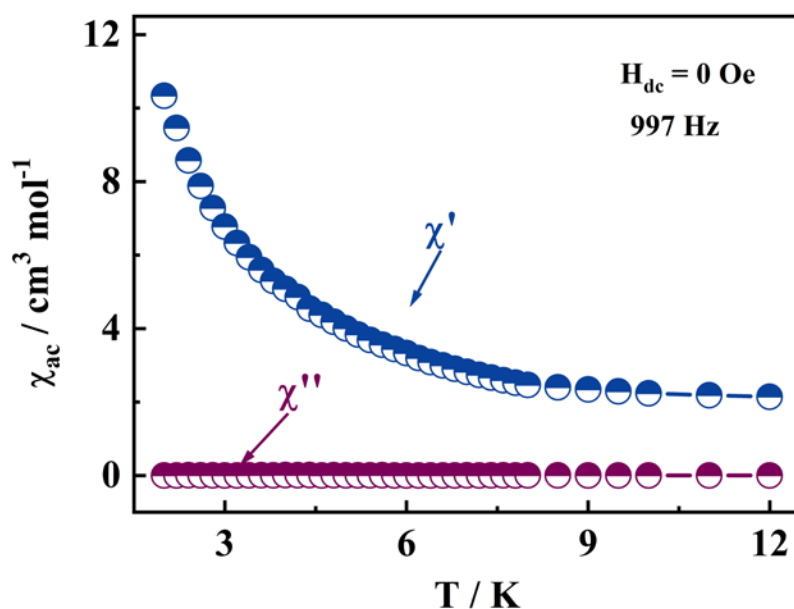

**Figure S8.** AC susceptibility measurements at frequency with 977 Hz for **1** at  $H_{dc} = 0$  Oe,  $H_{ac} = 2.5$  Oe

**Table S7.** Linear combination of two modified debye model fitting parameters from 2 to 7 K at  $H_{dc} = 2000$  Oe

| T /K | $\chi^2$ /cm <sup>3</sup> mol <sup>-1</sup> | $\chi^1$ /cm <sup>3</sup> mol <sup>-1</sup> | $\chi^0$ /cm <sup>3</sup> mol <sup>-1</sup> | $\tau_1$ /s | $\alpha_1$ | $\tau_2$ /s | $\alpha_2$ |
|------|---------------------------------------------|---------------------------------------------|---------------------------------------------|-------------|------------|-------------|------------|
| 2.0  | 8.17013(3)                                  | 30.88637(3)                                 | 0.05932(2)                                  | 0.15681(3)  | 0.61197(3) | 0.07813(4)  | 0.53235(3) |
| 2.5  | 6.26158(2)                                  | 30.05776(3)                                 | 0.12518(3)                                  | 0.07798(3)  | 0.57477(2) | 0.05504(11) | 0.50642(5) |
| 3.0  | 4.45468(10)                                 | 9.362200(4)                                 | 0.18504(3)                                  | 0.03917(4)  | 0.59412(8) | 0.03087(9)  | 0.38119(6) |
| 3.5  | 3.41827(4)                                  | 12.06544(2)                                 | 0.26272(2)                                  | 0.01892(5)  | 0.52011(6) | 0.02244(3)  | 0.41470(3) |

|     |            |              |            |            |            |            |            |
|-----|------------|--------------|------------|------------|------------|------------|------------|
| 4.0 | 2.81495(4) | 10.13028(4)  | 0.33112(4) | 0.01100(5) | 0.48396(5) | 0.01581(5) | 0.39021(3) |
| 4.5 | 2.41554(3) | 19.61455(5)  | 0.37435(7) | 0.00800(3) | 0.44415(6) | 0.00963(2) | 0.41420(4) |
| 5.0 | 2.14388(2) | 25.28558(3)  | 0.42505(6) | 0.00517(2) | 0.41641(6) | 0.00590(2) | 0.40128(2) |
| 5.5 | 1.93974(6) | 29.67630(8)  | 0.44859(9) | 0.00310(5) | 0.39878(4) | 0.00342(3) | 0.39020(4) |
| 6.0 | 1.77070(7) | 33.17694(2)  | 0.47873(3) | 0.00139(3) | 0.36814(3) | 0.00149(5) | 0.36404(2) |
| 6.5 | 1.63772(8) | 46.78638(7)  | 0.49054(4) | 0.00051(5) | 0.34091(3) | 0.00053(3) | 0.33988(3) |
| 7.0 | 1.53205(3) | 102.80047(6) | 0.51386(4) | 0.00020(8) | 0.31607(2) | 0.00020(7) | 0.31584(6) |

**Table S8.** The comparisons of the proton conductivity and the  $U_{\text{eff}}/k$  values of **1** with the previously reported proton-conductive nanomagnet. RH represents for relative humidity.

|   | Compounds                                                                                                                                                                                                                                               | Proton Conductivity                                                                                                                | $U_{\text{eff}}/k$                                                                | References                                              |
|---|---------------------------------------------------------------------------------------------------------------------------------------------------------------------------------------------------------------------------------------------------------|------------------------------------------------------------------------------------------------------------------------------------|-----------------------------------------------------------------------------------|---------------------------------------------------------|
| 1 | [Dy(H <sub>2</sub> bim) <sub>2</sub> (NO <sub>3</sub> ) <sub>2</sub> (H <sub>2</sub> O) <sub>2</sub> ](NO <sub>3</sub> ) <sub>3</sub> )                                                                                                                 | 8.70×10 <sup>-4</sup> S·cm <sup>-1</sup> under 25°C and 100% RH<br>1.16×10 <sup>-3</sup> S·cm <sup>-1</sup> under 35°C and 100% RH | 71.6 K for the FR phase and 74.4 K for the SR phase at H <sub>dc</sub> = 2000 Oe. | <b>This work</b>                                        |
| 2 | [Dy <sub>72</sub> (mda) <sub>24</sub> (mdaH) <sub>8</sub> (OH) <sub>120</sub> (O) <sub>8</sub> (NO <sub>3</sub> ) <sub>16</sub> ](NO <sub>3</sub> ) <sub>8</sub> ·16CH <sub>3</sub> OH·168H <sub>2</sub> O (mdaH <sub>2</sub> = N-methyldiethanolamine) | 1.80×10 <sup>-3</sup> S·cm <sup>-1</sup> under 25 °C and 95% RH                                                                    | 19.6 K at H <sub>dc</sub> = 0 Oe                                                  | <i>Adv. Mater.</i> , <b>2016</b> , 28, 10772–10779      |
| 3 | (H <sub>5</sub> O <sub>2</sub> ) <sub>2</sub> (H)[Yb <sup>III</sup> (hmpa) <sub>4</sub> ][Co <sup>III</sup> (CN) <sub>6</sub> ] <sub>2</sub> ·0.2H <sub>2</sub> O (HDBM = 1,3-diphenyl-propane-1,3-dione)                                               | 1.74×10 <sup>-4</sup> S·cm <sup>-1</sup> under 25 °C and 97% RH                                                                    | 31.2 K at H <sub>dc</sub> = 1000 Oe                                               | <i>J. Am. Chem. Soc.</i> , <b>2020</b> , 142, 3970–3979 |

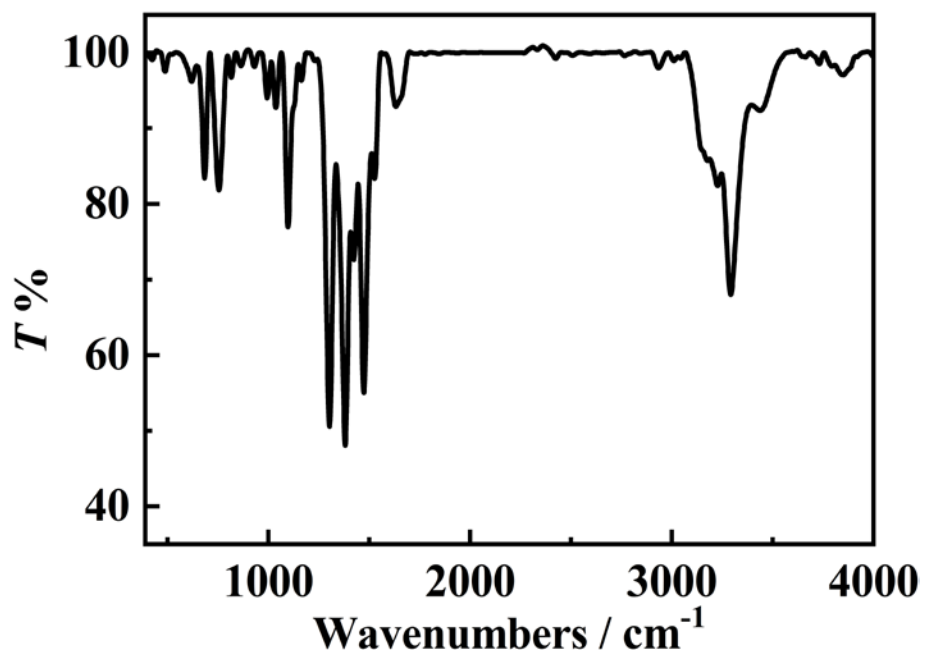

**Figure S9.** IR spectra for **1**.
